# Supplementary material
Source: HighWire-hosted journal article supplement (http://ajnr-stage2.highwire.org/highwire/filestream/182835/field_highwire_adjunct_files/0/19-00524.pdf)
Supplement: 19-00524.pdf [file 19-00524.pdf]

**On-line Table: Logistic regression—group differences**

| Group Comparison                           | Analysis Set                          | Outcome                                  |                                         |
|--------------------------------------------|---------------------------------------|------------------------------------------|-----------------------------------------|
|                                            |                                       | Functional Independence<br>(OR) (95% CI) | Successful Reperfusion<br>(OR) (95% CI) |
| Emergency conversion vs local anesthesia   | Full ( <i>n</i> = 238)                | 0.86 (0.14–5.11)                         | 0.26 (0.06–1.06)                        |
|                                            | Subset <sup>a</sup> ( <i>n</i> = 110) | 0.58 (0.02–16.33)                        | 0.21 (0.013–3.25)                       |
| Emergency conversion vs conscious sedation | Full ( <i>n</i> = 238)                | 1.07 (0.17–6.53)                         | 0.55 (0.13–2.19)                        |
|                                            | Subset <sup>a</sup> ( <i>n</i> = 110) | 1.91 (0.08–43.02)                        | 0.24 (0.02–3.72)                        |
| Emergency conversion vs general anesthesia | Full ( <i>n</i> = 238)                | 4.48 (0.49–40.86)                        | 1.28 (0.31–5.25)                        |
|                                            | Subset <sup>a</sup> ( <i>n</i> = 110) | 14.34 (0.14–1448.78)                     | 0.26 (0.01–5.04)                        |

<sup>a</sup>Subset analysis with collateral score and time from symptom onset to reperfusion. Functional independence was mRS at 90 days  $\leq 2$ . Successful reperfusion was TICI 2b/3 on the final angiogram. Results are derived from logistic regression models, adjusted for confounders. Variables in the full dataset analysis were age, sex, admission NIHSS, prestroke mRS  $> 1$ , ASPECTS on admission imaging, comorbidities, application of IV thrombolysis, location of vessel occlusion, and additionally TICI 2b/3 and occurrence of a drop of MAP in the analysis of functional independence, based on 238 complete observations. Variables in the subset analysis were all variables of the full dataset and additionally collateral score and time from symptom onset to reperfusion based on 110 complete observations.
